# Supplementary material for: Use of commercial microwave links as scintillometers: potential and limitations towards evaporation estimation
Source: Copernicus journal article supplement (doi:10.5194/egusphere-2024-2974), 2025-01-02
Supplement: Supplementary file 1 [file egusphere-2024-2974-supplement.pdf]

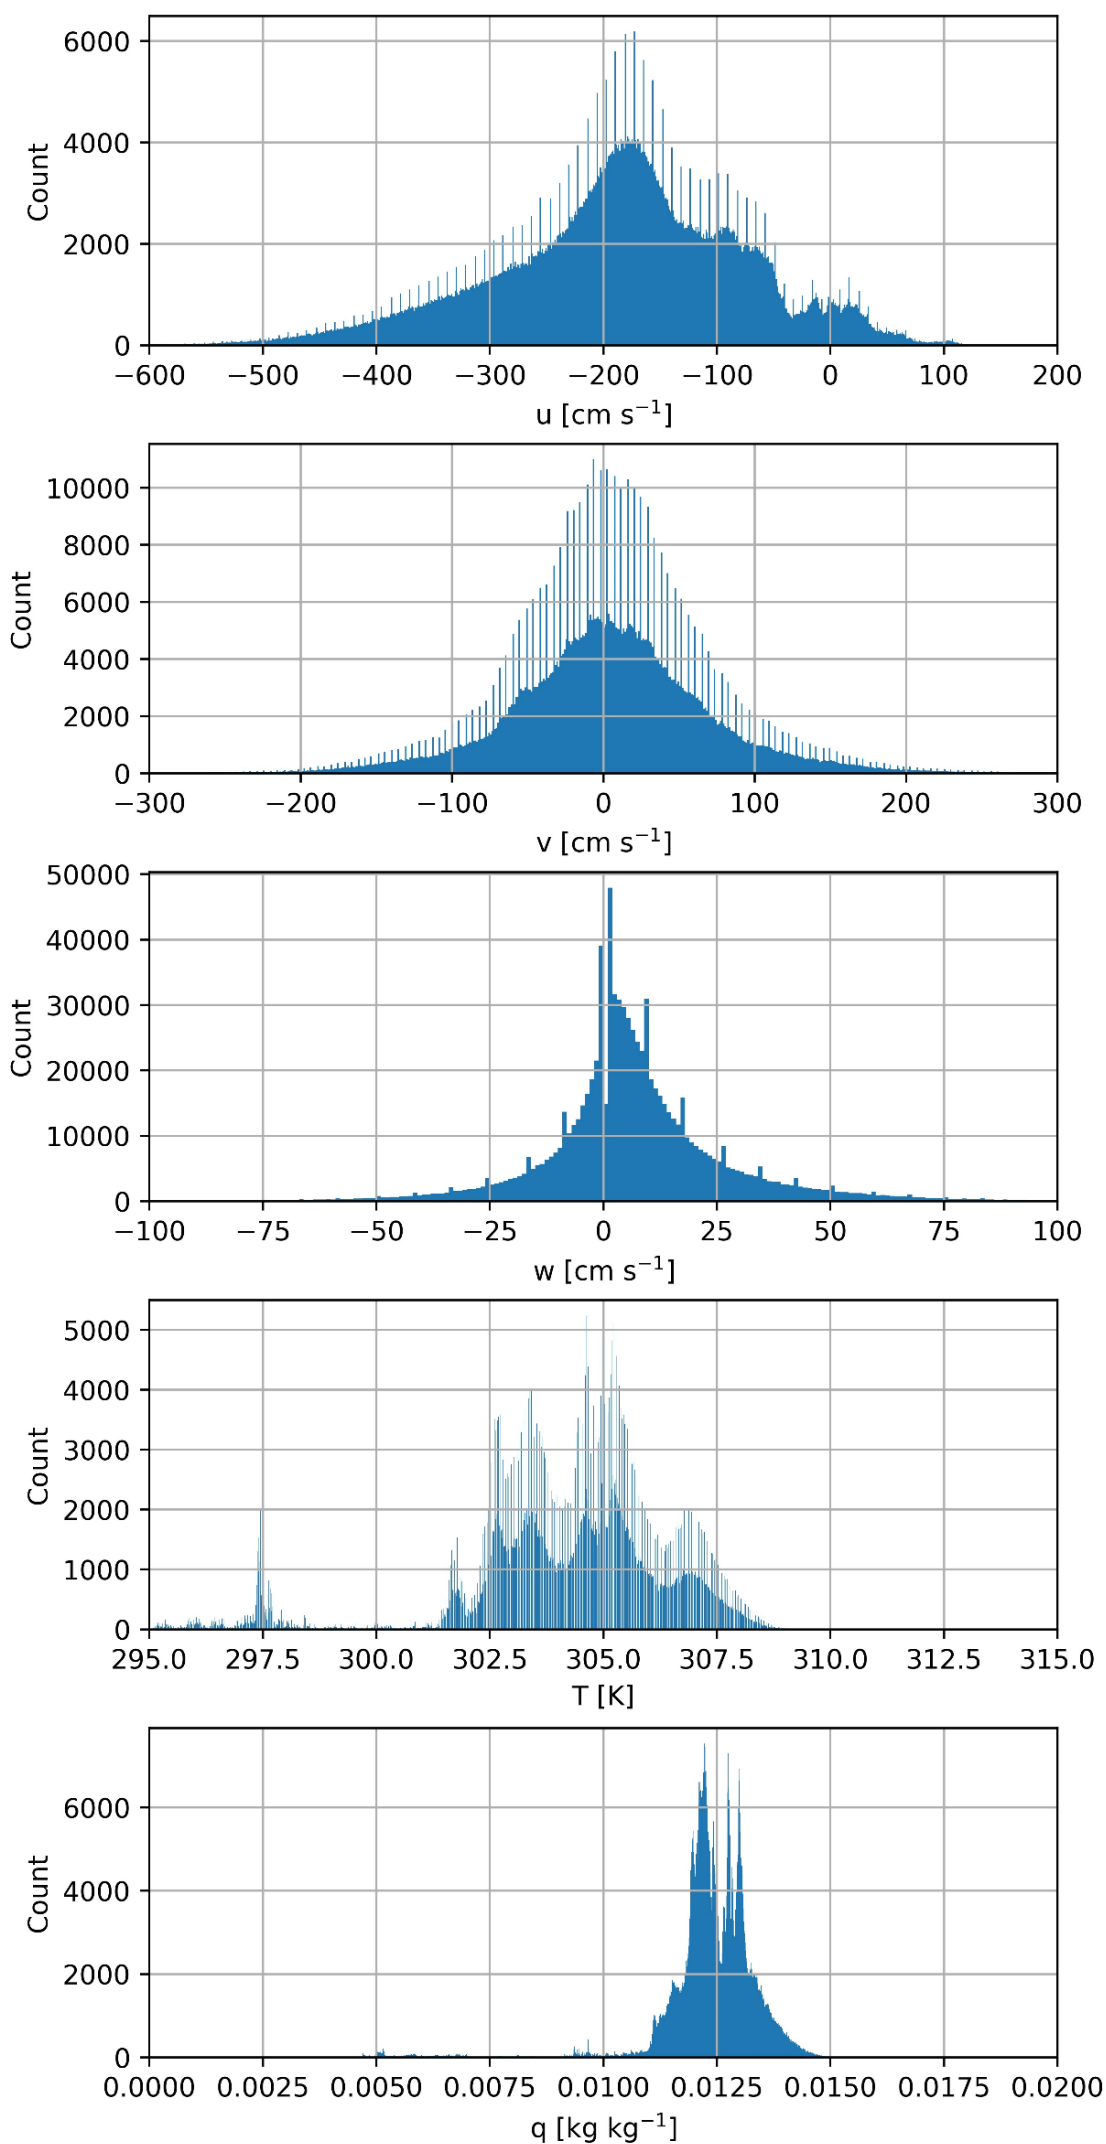

**Figure S1.** Histograms of horizontal wind speed  $u$  and  $v$ , vertical wind speed  $w$ , Temperature and specific humidity during 11 September 2023 as measured by the eddy-covariance system.
